# Supplementary material
Source: Research Square preprint supplement (doi:10.21203/rs.3.rs-9033598/v1)
Supplement: Supplementary file 1 [file 8f308c3fe1da04b6d8424f7a.docx]

# Supplementary Appendix

# Cytomegalovirus Infection Determines Microvascular Inflammation Risk beyond Alloimmunity in Kidney Transplantation

Thomas Vanhoutte, Matthias Diebold, Karolien Wellekens, Priyanka Koshi, Jasper Callemeyn, Bertrand Chauveau, Tim Debyser, Steffi De Pelsmaeker, Marie–Paule Emonds, Petra Hruba,Dirk Kuypers, Christophe Masset, Angelica Pagliazzi, Elisabeth Puchhammer-Stöckl, Arthur Vranken, Stefan Schaub, Aleksandar Senev, Elisabet Van Loon, Thibaut Vaulet, Hannes Vietzen, Maarten Coemans, Ondrej Viklicky, Georg A. Böhmig, Maarten Naesens

# Table of contents

Table S1: Cohort characteristics by center

Table S2: First MVI biopsy characteristic by CMV serostatus

Table S3: First MVI biopsy characteristic by centre

Table S4: Cox proportional hazards models for CMV serostatus and first MVI

Table S5: Cox proportional hazards models for CMV serostatus and first MVI without glomerulitis

Table S6: Cox proportional hazards models for CMV serostatus and first MVI including missing-self

Table S7: Cox proportional hazards models for first MVI using composite exposure categories combining any CMV seropositivity with HLA–DSA status or missing-self

Table S8: Cox proportional hazards models for CMV serostatus and first DSA-negative, C4d-negative MVI

Table S9: Cox proportional hazards models for CMV serostatus and first antibody-mediated rejection (AMR)

Table S10: Cox proportional hazards models for CMV serostatus graft failure

Table S11: Mediation analysis of the association between CMV serostatus, HLA–DSA status, HLA mismatch and graft failure

Table S12: Cox proportional hazards models for post-transplant CMV replication

Table S13: Cox proportional hazards models for post-transplant CMV disease

Table S14: Time-dependent Cox proportional hazards models for post-transplant CMV replication and first MVI

Table S15: Time-dependent Cox proportional hazards models for post-transplant CMV disease and first MVI

Table S16: Stratified time-dependent Cox proportional-hazards models of post-transplant CMV replication and first MVI, with interaction by recipient and donor serostatus

Table S17: Stratified time-dependent Cox proportional-hazards models of post-transplant CMV disease and first MVI, with interaction by recipient and donor serostatus

Table S18: Time-dependent Cox proportional hazards models for post-transplant CMV replication and graft failure

Table S19: Time-dependent Cox proportional hazards models for post-transplant CMV disease and graft failure

## Table S1. Cohort characteristics by center

| **Variable** | **Total (n: 4,411)** | **Basel (n: 506)** | **Leuven (n: 1,891)** | **Prague  (n: 1005)** | **Vienna (n: 1009)** |
| --- | --- | --- | --- | --- | --- |
| CMV D+/R+ | 1,673/4,411 (37.9%) | 175/506 (34.6%) | 478/1,891 (25.3%) | 572/1,005 (56.9%) | 448/1,009 (44.4%) |
| CMV D+/R− | 864/4,411 (19.6%) | 97/506 (19.2%) | 387/1,891 (20.5%) | 186/1,005 (18.5%) | 194/1,009 (19.2%) |
| CMV D−/R+ | 1,042/4,411 (23.6%) | 117/506 (23.1%) | 507/1,891 (26.8%) | 184/1,005 (18.3%) | 234/1,009 (23.2%) |
| CMV D−/R− | 832/4,411 (18.9%) | 117/506 (23.1%) | 519/1,891 (27.4%) | 63/1,005 (6.3%) | 133/1,009 (13.2%) |
| Recipient age | 56 (45.4–64.6) | 55 (45–63) | 56.7 (46.5–64.4) | 55.5 (45.1–65.8) | 54.9 (44.5–64.5) |
| Male recipient | 2,820/4,411 (63.9%) | 317/506 (62.6%) | 1,198/1,891 (63.4%) | 657/1,005 (65.4%) | 648/1,009 (64.2%) |
| Donor age | 53 (42.7–62) | 57 (48–65) | 51.7 (40.4–59.8) | 52 (43–64) | 54 (44–65) |
| Donation after brain death | 3,161/4,411 (71.7%) | 224/506 (44.3%) | 1,371/1,891 (72.5%) | 841/1,005 (83.7%) | 725/1,009 (71.9%) |
| Donation after cardiac death | 618/4,411 (14%) | 73/506 (14.4%) | 372/1,891 (19.7%) | 54/1,005 (5.4%) | 119/1,009 (11.8%) |
| Living donation | 632/4,411 (14.3%) | 209/506 (41.3%) | 148/1,891 (7.8%) | 110/1,005 (10.9%) | 165/1,009 (16.4%) |
| ABO-incompatible transplantation | 82/4,411 (1.9%) | 38/506 (7.5%) | 5/1,891 (0.3%) | 10/1,005 (1%) | 29/1,009 (2.9%) |
| Repeat transplantation | 657/4,411 (14.9%) | 66/506 (13%) | 285/1,891 (15.1%) | 122/1,005 (12.1%) | 184/1,009 (18.2%) |
| Cold ischemia time1 | 12.3 (6.2) | 6.8 (5.1) | 13.4 (5.5) | 12.2 (6.1) | 13.2 (6.4) |
| HLA mismatch | 3.2 (1.3) | 4.3 (1.4) | 2.8 (1.1) | 3.2 (1.2) | 3.3 (1.2) |
| HLA-DSA positive2 | 462/4,407 (10.5%) | 58/506 (11.5%) | 155/1,891 (8.2%) | 74/1,001 (7.4%) | 175/1,009 (17.3%) |
| Induction | 3,316/4,411 (75.2%) | 475/506 (93.9%) | 860/1,891 (45.5%) | 1,005/1,005 (100%) | 976/1,009 (96.7%) |
| No induction | 1,089/4,411 (24.7%) | 31/506 (6.1%) | 1,031/1,891 (54.5%) | 0/1,005 (0%) | 27/1,009 (2.7%) |
| ATG | 577/4,411 (13.1%) | 81/506 (16%) | 29/1,891 (1.5%) | 356/1,005 (35.4%) | 111/1,009 (11%) |
| IL2R | 2,602/4,411 (59%) | 394/506 (77.9%) | 824/1,891 (43.6%) | 532/1,005 (52.9%) | 852/1,009 (84.4%) |
| None | 1,094/4,411 (24.8%) | 31/506 (6.1%) | 1,036/1,891 (54.8%) | 0/1,005 (0%) | 27/1,009 (2.7%) |
| RTX | 13/4,411 (0.3%) | 0/506 (0%) | 0/1,891 (0%) | 0/1,005 (0%) | 13/1,009 (1.3%) |
| Other | 119/4,411 (2.7%) | 0/506 (0%) | 2/1,891 (0.1%) | 117/1,005 (11.6%) | 0/1,009 (0%) |
| Unknown3 | 6/4,411 (0.1%) | 0/506 (0%) | 0/1,891 (0%) | 0/1,005 (0%) | 6/1,009 (0.6%) |
| TAC–MMF–CS4 | 4,169/4,405 (94.6%) | 502/506 (99.2%) | 1,729/1,891 (91.4%) | 955/1,005 (95%) | 983/1,003 (98%) |
| Other maintenance therapy | 236/4,405 (5.4%) | 4/506 (0.8%) | 162/1,891 (8.6%) | 50/1,005 (5%) | 20/1,003 (2%) |

Data are median (IQR), mean (SD), or n/N (%).

Abbreviations**:** ATG: anti-thymocyte globulin; CMV: cytomegalovirus; CS: corticosteroids; D+/R+: CMV-seropositive donor to CMV-seropositive recipient; D+/R−: CMV-seropositive donor to CMV-seronegative recipient; D−/R+: CMV-seronegative donor to CMV-seropositive recipient; D−/R−: CMV-seronegative donor to CMV-seronegative recipient; DSA: donor-specific antibody; HLA: human leukocyte antigen; IL2R: interleukin-2 receptor; MMF: mycophenolate mofetil; RTX: rituximab; TAC: tacrolimus.

Missingdata**:** cold ischemia time1 (16 transplants); HLA-DSA at transplantation2 (4); induction type3 (6); maintenance immunosuppression4 (6).

## Table S2: First MVI biopsy characteristics by CMV serostatus

| **Variable** | **Full Cohort (n: 4,411)** | **CMV D+/R+ (n: 1,673)** | **CMV D+/R- (n: 864)** | **CMV D-/R+ (n: 1,042)** | **CMV D-/R- (n: 832)** |
| --- | --- | --- | --- | --- | --- |
| Transplants with ≥1 post–transplant biopsy | 3,713/4,411 (84.2%) | 1,372/1,673 (82%) | 724/864 (83.8%) | 874/1,042 (83.9%) | 743/832 (89.3%) |
| Number of biopsies | 2.3 (1.7) | 2 (1.6) | 2.3 (1.7) | 2.5 (1.8) | 2.7 (1.7) |
| MVI | 547/3,713 (14.7%) | 207/1,372 (15.1%) | 104/724 (14.4%) | 166/874 (19%) | 70/743 (9.4%) |
| Time to MVI | 365 (93–736) | 155 (84.8–480.5) | 367 (93–739) | 372.5 (93.2–746) | 423 (174.5–759) |
| MVI without glomerulitis criterion | 653/3,713 (17.6%) | 255/1,372 (18.6%) | 122/724 (16.9%) | 189/874 (21.6%) | 87/743 (11.7%) |
| Time to MVI without glomerulitis criterion | 359 (91–734) | 140.5 (78.8–429) | 365 (92–735) | 369 (92–743) | 408 (127.5–757) |
| Current/historic DSA positive | 194/547 (35.5%) | 75/207 (36.2%) | 33/104 (31.7%) | 58/166 (34.9%) | 28/70 (40%) |
| Current de novo DSA positive | 42/547 (7.7%) | 8/207 (3.9%) | 14/104 (13.5%) | 14/166 (8.4%) | 6/70 (8.6%) |
| C4d deposition | 113/547 (20.7%) | 41/207 (19.8%) | 24/104 (23.1%) | 27/166 (16.3%) | 21/70 (30%) |
| C4d deposition, IHC | 100/547 (18.3%) | 36/207 (17.4%) | 19/104 (18.3%) | 25/166 (15.1%) | 20/70 (28.6%) |
| C4d deposition, IF | 13/547 (2.4%) | 5/207 (2.4%) | 5/104 (4.8%) | 2/166 (1.2%) | 1/70 (1.4%) |
| No C4d deposition | 434/547 (79.3%) | 166/207 (80.2%) | 80/104 (76.9%) | 139/166 (83.7%) | 49/70 (70%) |
| DSA−/C4d−/MVI | 306/547 (55.9%) | 113/207 (54.6%) | 61/104 (58.7%) | 98/166 (59%) | 34/70 (48.6%) |
| AMR | 241/547 (44.1%) | 94/207 (45.4%) | 43/104 (41.3%) | 68/166 (41%) | 36/70 (51.4%) |
| glomerulitis score : 0 | 115/547 (21%) | 38/207 (18.4%) | 22/104 (21.2%) | 35/166 (21.1%) | 20/70 (28.6%) |
| glomerulitis score : 1 | 150/547 (27.4%) | 56/207 (27.1%) | 37/104 (35.6%) | 42/166 (25.3%) | 15/70 (21.4%) |
| glomerulitis score : 2 | 179/547 (32.7%) | 71/207 (34.3%) | 30/104 (28.8%) | 53/166 (31.9%) | 25/70 (35.7%) |
| glomerulitis score : 3 | 103/547 (18.8%) | 42/207 (20.3%) | 15/104 (14.4%) | 36/166 (21.7%) | 10/70 (14.3%) |
| peritubular capillaritis score : 0 | 128/547 (23.4%) | 44/207 (21.3%) | 25/104 (24%) | 45/166 (27.1%) | 14/70 (20%) |
| peritubular capillaritis score : 1 | 127/547 (23.2%) | 57/207 (27.5%) | 24/104 (23.1%) | 30/166 (18.1%) | 16/70 (22.9%) |
| peritubular capillaritis score : 2 | 235/547 (43%) | 79/207 (38.2%) | 46/104 (44.2%) | 74/166 (44.6%) | 36/70 (51.4%) |
| peritubular capillaritis score : 3 | 57/547 (10.4%) | 27/207 (13%) | 9/104 (8.7%) | 17/166 (10.2%) | 4/70 (5.7%) |
| Total MVI score : 2 | 267/547 (48.8%) | 95/207 (45.9%) | 56/104 (53.8%) | 79/166 (47.6%) | 37/70 (52.9%) |
| Total MVI score : 3 | 144/547 (26.3%) | 53/207 (25.6%) | 27/104 (26%) | 46/166 (27.7%) | 18/70 (25.7%) |
| Total MVI score : 4 | 77/547 (14.1%) | 32/207 (15.5%) | 14/104 (13.5%) | 23/166 (13.9%) | 8/70 (11.4%) |
| Total MVI score : 5 | 47/547 (8.6%) | 19/207 (9.2%) | 6/104 (5.8%) | 15/166 (9%) | 7/70 (10%) |
| Total MVI score : 6 | 12/547 (2.2%) | 8/207 (3.9%) | 1/104 (1%) | 3/166 (1.8%) | 0/70 (0%) |

Abbreviations: AMR, antibody-mediated rejection; C4d, complement split product C4d; CMV, cytomegalovirus; D, donor; DSA, donor-specific antibody; HLA, human leukocyte antigen; IF, immunofluorescence; IHC, immunohistochemistry; R, recipient.

## Table S3: First MVI biopsy characteristics by center

| **Variable** | **Total (n: 4,411)** | **Basel (n: 506)** | **Leuven (n: 1,891)** | **Prague  (n: 1005)** | **Vienna (n: 1009)** |
| --- | --- | --- | --- | --- | --- |
| Transplants with ≥1 post–transplant biopsy | 3,713/4,411 (84.2%) | 460/506 (90.9%) | 1,805/1,891 (95.5%) | 786/1,005 (78.2%) | 662/1,009 (65.6%) |
| Number of biopsies | 2.3 (1.7) | 2 (1.2) | 3.3 (1.6) | 1.5 (1.2) | 1.4 (1.4) |
| MVI | 547/3,713 (14.7%) | 66/460 (14.3%) | 308/1,805 (17.1%) | 67/786 (8.5%) | 106/662 (16%) |
| Time to MVI | 365 (93–736) | 373 (185–395) | 726 (355–795) | 102 (83–136.2) | 120 (23–466) |
| MVI without glomerulitis criterion | 653/3,713 (17.6%) | 84/460 (18.3%) | 383/1,805 (21.2%) | 68/786 (8.7%) | 118/662 (17.8%) |
| Time to MVI without glomerulitis criterion | 359 (91–734) | 370 (177–394) | 720 (168–777) | 101.5 (83–136.2) | 117.5 (22.2–456.5) |
| Current/historic DSA positive | 194/547 (35.5%) | 17/66 (25.8%) | 102/308 (33.1%) | 18/67 (26.9%) | 57/106 (53.8%) |
| Current de novo DSA positive | 42/547 (7.7%) | 4/66 (6.1%) | 22/308 (7.1%) | 0/67 (0%) | 16/106 (15.1%) |
| C4d deposition | 113/547 (20.7%) | 14/66 (21.2%) | 55/308 (17.9%) | 13/67 (19.4%) | 31/106 (29.2%) |
| C4d deposition, IHC | 100/547 (18.3%) | 14/66 (21.2%) | 55/308 (17.9%) | 0/67 (0%) | 31/106 (29.2%) |
| C4d deposition, IF | 13/547 (2.4%) | 0/66 (0%) | 0/308 (0%) | 13/67 (19.4%) | 0/106 (0%) |
| No C4d deposition | 434/547 (79.3%) | 52/66 (78.8%) | 253/308 (82.1%) | 54/67 (80.6%) | 75/106 (70.8%) |
| DSA−/C4d−/MVI | 306/547 (55.9%) | 40/66 (60.6%) | 187/308 (60.7%) | 40/67 (59.7%) | 39/106 (36.8%) |
| AMR | 241/547 (44.1%) | 26/66 (39.4%) | 121/308 (39.3%) | 27/67 (40.3%) | 67/106 (63.2%) |
| glomerulitis score : 0 | 115/547 (21%) | 38/66 (57.6%) | 58/308 (18.8%) | 2/67 (3%) | 17/106 (16%) |
| glomerulitis score : 1 | 150/547 (27.4%) | 16/66 (24.2%) | 83/308 (26.9%) | 23/67 (34.3%) | 28/106 (26.4%) |
| glomerulitis score : 2 | 179/547 (32.7%) | 10/66 (15.2%) | 107/308 (34.7%) | 30/67 (44.8%) | 32/106 (30.2%) |
| glomerulitis score : 3 | 103/547 (18.8%) | 2/66 (3%) | 60/308 (19.5%) | 12/67 (17.9%) | 29/106 (27.4%) |
| peritubular capillaritis score : 0 | 128/547 (23.4%) | 3/66 (4.5%) | 92/308 (29.9%) | 20/67 (29.9%) | 13/106 (12.3%) |
| peritubular capillaritis score : 1 | 127/547 (23.2%) | 5/66 (7.6%) | 64/308 (20.8%) | 28/67 (41.8%) | 30/106 (28.3%) |
| peritubular capillaritis score : 2 | 235/547 (43%) | 53/66 (80.3%) | 121/308 (39.3%) | 18/67 (26.9%) | 43/106 (40.6%) |
| peritubular capillaritis score : 3 | 57/547 (10.4%) | 5/66 (7.6%) | 31/308 (10.1%) | 1/67 (1.5%) | 20/106 (18.9%) |
| Total MVI score : 2 | 267/547 (48.8%) | 45/66 (68.2%) | 153/308 (49.7%) | 33/67 (49.3%) | 36/106 (34%) |
| Total MVI score : 3 | 144/547 (26.3%) | 12/66 (18.2%) | 86/308 (27.9%) | 20/67 (29.9%) | 26/106 (24.5%) |
| Total MVI score : 4 | 77/547 (14.1%) | 7/66 (10.6%) | 38/308 (12.3%) | 10/67 (14.9%) | 22/106 (20.8%) |
| Total MVI score : 5 | 47/547 (8.6%) | 2/66 (3%) | 26/308 (8.4%) | 4/67 (6%) | 15/106 (14.2%) |
| Total MVI score : 6 | 12/547 (2.2%) | 0/66 (0%) | 5/308 (1.6%) | 0/67 (0%) | 7/106 (6.6%) |

Abbreviations: AMR, antibody-mediated rejection; C4d, complement split product C4d; CMV, cytomegalovirus; D, donor; DSA, donor-specific antibody; HLA, human leukocyte antigen; IF, immunofluorescence; IHC, immunohistochemistry; R, recipient.

## Table S4: Cox proportional hazards models for CMV serostatus and first MVI

| **Factors** | **Level** | **Events/ N analyzed** | **Events (group)/ N (group)** | **HR (95% CI)** | **P value** | **Events/ N analyzed** | **Events (group)/ N (group)** | **Adjusted HR (95% CI)** | **P value** |
| --- | --- | --- | --- | --- | --- | --- | --- | --- | --- |
|  |  | **UNIVARIABLE ANALYSIS** | | | | **MULTIVARIABLE ANALYSIS** | | | |
| Calendar year of transplantation (per year) | — | 529/3,713 | — | 0.97 (0.95–0.98) | 1.72 × 10-4 | 526/3,693 | — | 0.94 (0.92–0.96) | 8.37 × 10-7 |
| Centre | Basel | 529/3,713 | 66/460 | Ref. | Ref. | 526/3,693 | 66/460 | Ref. | Ref. |
|  | Leuven |  | 297/1,805 | 0.88 (0.67–1.16) | 0.36 |  | 296/1,804 | 0.82 (0.58–1.15) | 0.25 |
|  | Prague |  | 67/786 | 0.81 (0.57–1.14) | 0.22 |  | 67/782 | 0.99 (0.68–1.44) | 0.96 |
|  | Vienna |  | 99/662 | 1.12 (0.82–1.53) | 0.49 |  | 97/647 | 0.87 (0.62–1.23) | 0.44 |
| Cold ischemia time (per 5 hours) | — | 526/3,697 | — | 1.13 (1.05–1.21) | 7.64 × 10-4 | 526/3,693 | — | 1.13 (1.03–1.25) | 0.009 |
| Donor age (per 10 years) | — | 529/3,713 | — | 1.08 (1.02–1.14) | 0.011 | 526/3,693 | — | 1.11 (1.04–1.18) | 0.0016 |
| Donor type | Living | 529/3,713 | 65/522 | Ref. | Ref. | 526/3,693 | 63/511 | Ref. | Ref. |
|  | DBD |  | 386/2,634 | 1.14 (0.88–1.48) | 0.33 |  | 385/2,626 | 0.79 (0.54–1.13) | 0.2 |
|  | DCD |  | 78/557 | 1.04 (0.75–1.44) | 0.82 |  | 78/556 | 0.88 (0.59–1.33) | 0.55 |
| Donor–recipient CMV serostatus | D−/R− | 529/3,713 | 66/743 | Ref. | Ref. | 526/3,693 | 66/739 | Ref. | Ref. |
|  | D+/R+ |  | 204/1,372 | 2.17 (1.64–2.87) | 4.82 × 10-8 |  | 203/1,363 | 2.10 (1.58–2.80) | 3.53 × 10-7 |
|  | D+/R− |  | 99/724 | 1.75 (1.28–2.39) | 4.29 × 10-4 |  | 98/721 | 1.79 (1.30–2.45) | 3.04 × 10-4 |
|  | D−/R+ |  | 160/874 | 2.33 (1.75–3.11) | 7.04 × 10-9 |  | 159/870 | 2.09 (1.56–2.80) | 6.65 × 10-7 |
| HLA mismatch (per mismatch) | — | 529/3,713 | — | 1.14 (1.08–1.21) | 1.16 × 10-5 | 526/3,693 | — | 1.15 (1.07–1.23) | 7.19 × 10-5 |
| HLA-DSA status | Negative | 529/3,709 | 379/3,326 | Ref. | Ref. | 526/3,693 | 376/3,311 | Ref. | Ref. |
|  | Positive |  | 150/383 | 4.25 (3.51–5.13) | 2.09 × 10-50 |  | 150/382 | 3.61 (2.89–4.51) | 5.91 × 10-30 |
| Recipient age (per 10 years) | — | 529/3,713 | — | 1.04 (0.97–1.11) | 0.28 | 526/3,693 | — | 0.97 (0.90–1.04) | 0.37 |
| Recipient sex | Male | 529/3,713 | 284/2,402 | Ref. | Ref. | 526/3,693 | 282/2,391 | Ref. | Ref. |
|  | Female |  | 245/1,311 | 1.56 (1.31–1.85) | 3.65 × 10-7 |  | 244/1,302 | 1.27 (1.07–1.52) | 0.007 |
| Repeat transplantation | No | 529/3,713 | 405/3,155 | Ref. | Ref. | 526/3,693 | 402/3,135 | Ref. | Ref. |
|  | Yes |  | 124/558 | 1.88 (1.54–2.30) | 7.32 × 10-10 |  | 124/558 | 1.20 (0.95–1.51) | 0.13 |

Values are hazard ratios (HRs) with 95% confidence intervals (CIs) from univariable and multivariable Cox proportional-hazards models. Total events and events per subgroup are presented as n/N, where n denotes the number of events and N the number of participants with non-missing data for the respective covariate. Multivariable models were adjusted for recipient age and sex; donor age and type (living, donation after circulatory death or donation after brain death); repeat transplantation; calendar year of transplantation; HLA mismatch; HLA-DSA status at transplantation; cold ischemia time; and transplant center.

Abbreviations: CMV, cytomegalovirus; D, donor; DSA, donor-specific antibody; HLA, human leukocyte antigen; R, recipient; Ref., reference.

## Table S5: Cox proportional hazards models for CMV serostatus and first MVI without glomerulitis

| **Factors** | **Level** | **Events/ N analyzed** | **Events (group)/ N (group)** | **HR (95% CI)** | **P value** | **Events/ N analyzed** | **Events (group)/ N (group)** | **Adjusted HR (95% CI)** | **P value** |
| --- | --- | --- | --- | --- | --- | --- | --- | --- | --- |
|  |  | **UNIVARIABLE ANALYSIS** | | | | **MULTIVARIABLE ANALYSIS** | | | |
| Calendar year of transplantation (per year) | — | 637/3,713 | — | 0.96 (0.94–0.97) | 6.45 × 10-9 | 633/3,693 | — | 0.93 (0.91–0.95) | 1.69 × 10-9 |
| Centre | Basel | 637/3,713 | 84/460 | Ref. | Ref. | 633/3,693 | 84/460 | Ref. | Ref. |
|  | Leuven |  | 374/1,805 | 0.89 (0.70–1.14) | 0.36 |  | 373/1,804 | 0.84 (0.62–1.14) | 0.27 |
|  | Prague |  | 68/786 | 0.63 (0.45–0.86) | 0.0042 |  | 68/782 | 0.78 (0.55–1.10) | 0.16 |
|  | Vienna |  | 111/662 | 0.97 (0.73–1.29) | 0.84 |  | 108/647 | 0.80 (0.59–1.09) | 0.15 |
| Cold ischemia time (per 5 hours) | — | 633/3,697 | — | 1.10 (1.04–1.18) | 0.002 | 633/3,693 | — | 1.13 (1.03–1.23) | 0.0068 |
| Donor age (per 10 years) | — | 637/3,713 | — | 1.03 (0.98–1.09) | 0.21 | 633/3,693 | — | 1.08 (1.02–1.14) | 0.011 |
| Donor type | Living | 637/3,713 | 82/522 | Ref. | Ref. | 633/3,693 | 80/511 | Ref. | Ref. |
|  | DBD |  | 459/2,634 | 1.08 (0.85–1.36) | 0.54 |  | 457/2,626 | 0.82 (0.59–1.14) | 0.24 |
|  | DCD |  | 96/557 | 1.02 (0.76–1.37) | 0.88 |  | 96/556 | 0.90 (0.62–1.30) | 0.57 |
| Donor–recipient CMV serostatus | D−/R− | 637/3,713 | 83/743 | Ref. | Ref. | 633/3,693 | 83/739 | Ref. | Ref. |
|  | D+/R+ |  | 252/1,372 | 2.15 (1.68–2.76) | 1.53 × 10-9 |  | 251/1,363 | 2.32 (1.80–3.00) | 1.21 × 10-10 |
|  | D+/R− |  | 117/724 | 1.65 (1.24–2.18) | 5.21 × 10-4 |  | 116/721 | 1.74 (1.31–2.31) | 1.41 × 10-4 |
|  | D−/R+ |  | 185/874 | 2.16 (1.66–2.79) | 6.07 × 10-9 |  | 183/870 | 2.04 (1.57–2.65) | 1.07 × 10-7 |
| HLA mismatch (per mismatch) | — | 637/3,713 | — | 1.14 (1.08–1.21) | 1.14 × 10-6 | 633/3,693 | — | 1.17 (1.10–1.25) | 5.33 × 10-7 |
| HLA–DSA status | Negative | 637/3,709 | 479/3,326 | Ref. | Ref. | 633/3,693 | 475/3,311 | Ref. | Ref. |
|  | Positive |  | 158/383 | 3.53 (2.95–4.23) | 1.01 × 10-42 |  | 158/382 | 3.26 (2.64–4.01) | 1.72 × 10-28 |
| Recipient age (per 10 years) | — | 637/3,713 | — | 0.98 (0.93–1.04) | 0.58 | 633/3,693 | — | 0.91 (0.86–0.98) | 0.0082 |
| Recipient sex | Male | 637/3,713 | 356/2,402 | Ref. | Ref. | 633/3,693 | 353/2,391 | Ref. | Ref. |
|  | Female |  | 281/1,311 | 1.42 (1.22–1.66) | 1.02 × 10-5 |  | 280/1,302 | 1.18 (1.00–1.38) | 0.047 |
| Repeat transplantation | No | 637/3,713 | 504/3,155 | Ref. | Ref. | 633/3,693 | 500/3,135 | Ref. | Ref. |
|  | Yes |  | 133/558 | 1.60 (1.32–1.94) | 1.43 × 10-6 |  | 133/558 | 1.05 (0.84–1.30) | 0.67 |

Values are hazard ratios (HRs) with 95% confidence intervals (CIs) from univariable and multivariable Cox proportional-hazards models. Total events and events per subgroup are presented as n/N, where n denotes the number of events and N the number of participants with non-missing data for the respective covariate. Multivariable models were adjusted for recipient age and sex; donor age and type (living, donation after circulatory death or donation after brain death); repeat transplantation; calendar year of transplantation; HLA mismatch; HLA-DSA status at transplantation; cold ischemia time; and transplant center.

Abbreviations: CMV, cytomegalovirus; D, donor; DSA, donor-specific antibody; HLA, human leukocyte antigen; R, recipient; Ref., reference.

## Table S6: Cox proportional hazards models for CMV serostatus and first MVI including missing-self

| **Factors** | **Level** | **Events/ N analyzed** | **Events (group)/ N (group)** | **HR (95% CI)** | **P value** | **Events/ N analyzed** | **Events (group)/ N (group)** | **Adjusted HR (95% CI)** | **P value** |
| --- | --- | --- | --- | --- | --- | --- | --- | --- | --- |
|  |  | **UNIVARIABLE ANALYSIS** | | | | **MULTIVARIABLE ANALYSIS** | | | |
| Calendar year of transplantation (per year) | — | 363/2,265 | — | 0.95 (0.93–0.97) | 1.37 × 10-5 | 346/2,131 | — | 0.94 (0.92–0.97) | 1.82 × 10-5 |
| Centre | Basel | 363/2,265 | 66/460 | Ref. | Ref. | 346/2,131 | 66/460 | Ref. | Ref. |
|  | Leuven |  | 297/1,805 | 0.93 (0.71–1.22) | 0.62 |  | 280/1,671 | 0.90 (0.63–1.29) | 0.57 |
| Cold ischemia time (per 5 hours) | — | 362/2,264 | — | 1.12 (1.03–1.22) | 0.0087 | 346/2,131 | — | 1.13 (1.00–1.27) | 0.048 |
| Donor age (per 10 years) | — | 363/2,265 | — | 1.13 (1.05–1.22) | 9.08 × 10-4 | 346/2,131 | — | 1.17 (1.08–1.27) | 1.08 × 10-4 |
| Donor type | Living | 363/2,265 | 44/334 | Ref. | Ref. | 346/2,131 | 39/291 | Ref. | Ref. |
|  | DBD |  | 260/1,508 | 1.21 (0.88–1.67) | 0.24 |  | 250/1,434 | 0.88 (0.55–1.41) | 0.6 |
|  | DCD |  | 59/423 | 0.99 (0.67–1.46) | 0.96 |  | 57/406 | 0.87 (0.52–1.45) | 0.59 |
| Donor–recipient CMV serostatus | D−/R− | 363/2,265 | 57/608 | Ref. | Ref. | 346/2,131 | 54/563 | Ref. | Ref. |
|  | D+/R+ |  | 112/615 | 2.12 (1.54–2.91) | 3.97 × 10-6 |  | 107/582 | 1.85 (1.33–2.58) | 2.63 × 10-4 |
|  | D+/R− |  | 72/451 | 1.78 (1.26–2.52) | 0.0011 |  | 70/420 | 1.80 (1.26–2.57) | 0.0013 |
|  | D−/R+ |  | 122/591 | 2.34 (1.71–3.21) | 1.10 × 10-7 |  | 115/566 | 2.01 (1.45–2.80) | 2.98 × 10-5 |
| HLA mismatch (per mismatch) | — | 363/2,265 | — | 1.14 (1.06–1.22) | 2.52 × 10-4 | 346/2,131 | — | 1.13 (1.04–1.24) | 0.0054 |
| Missing-self status | Low or no missing-self <2 | 346/2,131 | 276/1,830 | Ref. | Ref. | 346/2,131 | 276/1,830 | Ref. | Ref. |
|  | High missing-self >2 |  | 70/301 | 1.68 (1.29–2.18) | 0.00011 |  | 70/301 | 1.67 (1.28–2.18) | 1.71 × 10-4 |
| HLA-DSA status | Negative | 363/2,265 | 268/2,064 | Ref. | Ref. | 346/2,131 | 255/1,946 | Ref. | Ref. |
|  | Positive |  | 95/201 | 4.90 (3.87–6.21) | 7.98 × 10-40 |  | 91/185 | 4.24 (3.23–5.58) | 3.57 × 10-25 |
| Recipient age (per 10 years) | — | 363/2,265 | — | 1.03 (0.95–1.12) | 0.44 | 346/2,131 | — | 0.95 (0.86–1.04) | 0.23 |
| Recipient sex | Male | 363/2,265 | 188/1,439 | Ref. | Ref. | 346/2,131 | 178/1,347 | Ref. | Ref. |
|  | Female |  | 175/826 | 1.64 (1.34–2.02) | 2.23 × 10-6 |  | 168/784 | 1.36 (1.09–1.68) | 0.0058 |
| Repeat transplantation | No | 363/2,265 | 280/1,937 | Ref. | Ref. | 346/2,131 | 269/1,831 | Ref. | Ref. |
|  | Yes |  | 83/328 | 1.96 (1.54–2.51) | 7.19 × 10-8 |  | 77/300 | 1.38 (1.04–1.84) | 0.027 |

Values are hazard ratios (HRs) with 95% confidence intervals (CIs) from univariable and multivariable Cox proportional-hazards models. Total events and events per subgroup are presented as n/N, where n denotes the number of events and N the number of participants with non-missing data for the respective covariate. Multivariable models were adjusted for recipient age and sex, donor age and type (living, donation after circulatory death, donation after brain death), repeat transplantation, calendar year of transplantation, HLA mismatch, HLA-DSA status at transplantation, missing-self status (low or no missing-self (<2) versus high missing-self (≥2)), cold ischemia time, and transplant center.

Abbreviations: CMV, cytomegalovirus; D, donor; DSA, donor-specific antibody; HLA, human leukocyte antigen; R, recipient; Ref., reference.

## Table S7: Cox proportional hazards models for first MVI using composite exposure categories combining any CMV seropositivity with HLA–DSA status or missing-self

| **Factors** | **Level** | **Events (group)/ N (group)** | **HR (95% CI)** | **P value** | **Events (group)/ N (group)** | **Adjusted HR (95% CI)** | **P value** |
| --- | --- | --- | --- | --- | --- | --- | --- |
|  |  | **UNIVARIABLE ANALYSIS** | | | **MULTIVARIABLE ANALYSIS** | | |
| **HLA-DSA status and CMV status** | No DSA, CMV− | 45/682 | Ref. | Ref. | 45/679 | Ref. | Ref. |
|  | No DSA, CMV+ | 334/2,644 | 2.31 (1.69–3.15) | 1.44 × 10-7 | 331/2,632 | 2.22 (1.62–3.04) | 7.23 × 10-7 |
|  | DSA, CMV− | 21/60 | 6.50 (3.87–10.92) | 1.41 × 10-12 | 21/60 | 4.87 (2.85–8.32) | 6.76 × 10-9 |
|  | DSA, CMV+ | 129/323 | 8.96 (6.37–12.59) | 1.87 × 10-36 | 129/322 | 7.73 (5.36–11.17) | 9.70 × 10-28 |
| **Missing-self and CMV status** | MS<2, CMV− | 41/480 | Ref. | Ref. | 41/480 | Ref. | Ref. |
|  | MS<2, CMV+ | 235/1,350 | 2.19 (1.57–3.05) | 3.58 × 10-6 | 235/1,350 | 1.92 (1.37–2.68) | 1.36 × 10-4 |
|  | MS≥2, CMV− | 13/83 | 2.03 (1.09–3.78) | 0.027 | 13/83 | 1.74 (0.92–3.26) | 0.087 |
|  | MS≥2, CMV+ | 57/218 | 3.56 (2.38–5.32) | 5.68 × 10-10 | 57/218 | 3.17 (2.11–4.76) | 2.99 × 10-8 |

Values are hazard ratios (HRs) with 95% confidence intervals (CIs) from univariable and multivariable Cox proportional-hazards models. CMV+ denotes any CMV-exposed donor–recipient combination (D+/R+, D+/R–, or D–/R+). Univariable and multivariable models for CMV and HLA–DSA status included 3,709 transplants with 529 events and 3,693 transplants with 526 events, respectively. Corresponding models for CMV and missing-self included 2,131 transplants and 346 events. Events per subgroup are shown as n/N, where n is the number of events and N the number of participants with non-missing data. Multivariable models were adjusted for recipient age and sex, donor age and type (living, donation after circulatory death, donation after brain death), repeat transplantation, calendar year of transplantation, HLA mismatch, cold ischemia time, and transplant center.

Abbreviations: CMV, cytomegalovirus; D, donor; DSA, donor-specific antibody; HLA, human leukocyte antigen; R, recipient; Ref., reference.

## Table S8: Cox proportional hazards models for CMV serostatus and first DSA-negative, C4d-negative MVI

| **Factors** | **Level** | **Events/ N analyzed** | **Events (group)/ N (group)** | **HR (95% CI)** | **P value** | **Events/ N analyzed** | **Events (group)/ N (group)** | **Adjusted HR (95% CI)** | **P value** |
| --- | --- | --- | --- | --- | --- | --- | --- | --- | --- |
|  |  | **UNIVARIABLE ANALYSIS** | | | | **MULTIVARIABLE ANALYSIS** | | | |
| Calendar year of transplantation (per year) | — | 300/3,709 | — | 0.97 (0.95–0.99) | 0.0051 | 299/3,693 | — | 0.95 (0.92–0.98) | 0.0024 |
| Centre | Basel | 300/3,709 | 40/460 | Ref. | Ref. | 299/3,693 | 40/460 | Ref. | Ref. |
|  | Leuven |  | 182/1,805 | 0.92 (0.65–1.29) | 0.62 |  | 181/1,804 | 0.86 (0.56–1.33) | 0.51 |
|  | Prague |  | 40/782 | 0.75 (0.48–1.17) | 0.2 |  | 40/782 | 0.88 (0.54–1.42) | 0.6 |
|  | Vienna |  | 38/662 | 0.70 (0.45–1.09) | 0.11 |  | 38/647 | 0.67 (0.42–1.07) | 0.094 |
| Cold ischemia time (per 5 hours) | — | 299/3,693 | — | 1.09 (0.99–1.19) | 0.074 | 299/3,693 | — | 1.12 (0.99–1.27) | 0.065 |
| Donor age (per 10 years) | — | 300/3,709 | — | 1.17 (1.08–1.27) | 0.00016 | 299/3,693 | — | 1.16 (1.06–1.26) | 9.98 × 10-4 |
| Donor type | Living | 300/3,709 | 34/521 | Ref. | Ref. |  | 34/511 | Ref. | Ref. |
|  | DBD |  | 212/2,631 | 1.20 (0.83–1.72) | 0.33 |  | 211/2,626 | 0.85 (0.52–1.39) | 0.53 |
|  | DCD |  | 54/557 | 1.38 (0.90–2.12) | 0.14 | 299/3,693 | 54/556 | 1.11 (0.66–1.88) | 0.69 |
| Donor–recipient CMV serostatus | D−/R− | 300/3,709 | 33/742 | Ref. | Ref. | 299/3,693 | 33/739 | Ref. | Ref. |
|  | D+/R+ |  | 112/1,370 | 2.32 (1.57–3.42) | 2.26 × 10-5 |  | 112/1,363 | 2.34 (1.57–3.49) | 3.07 × 10-5 |
|  | D+/R− |  | 59/724 | 2.06 (1.34–3.15) | 9.16 × 10-4 |  | 58/721 | 1.99 (1.29–3.06) | 0.0017 |
|  | D−/R+ |  | 96/873 | 2.77 (1.86–4.11) | 4.50 × 10-7 |  | 96/870 | 2.64 (1.77–3.93) | 2.06 × 10-6 |
| HLA mismatch (per mismatch) | — | 300/3,709 | — | 1.16 (1.07–1.25) | 3.37 × 10-4 |  | — | 1.17 (1.07–1.28) | 6.92 × 10-4 |
| Recipient age (per 10 years) | — | 300/3,709 | — | 1.13 (1.03–1.24) | 0.0078 | 299/3,693 | — | 1.02 (0.92–1.13) | 0.71 |
| Recipient sex | Male | 300/3,709 | 172/2,400 | Ref. | Ref. | 299/3,693 | 171/2,391 | Ref. | Ref. |
|  | Female |  | 128/1,309 | 1.35 (1.07–1.69) | 0.011 |  | 128/1,302 | 1.28 (1.02–1.62) | 0.034 |
| Repeat transplantation | No | 300/3,709 | 264/3,151 | Ref. | Ref. | 299/3,693 | 263/3,135 | Ref. | Ref. |
|  | Yes |  | 36/558 | 0.83 (0.59–1.18) | 0.29 |  | 36/558 | 0.90 (0.63–1.29) | 0.57 |

Values are hazard ratios (HRs) with 95% confidence intervals (CIs) from univariable and multivariable Cox proportional-hazards models. Total events and events per subgroup are presented as n/N, where n denotes the number of events and N the number of participants with non-missing data for the respective covariate. Multivariable models were adjusted for recipient age and sex, donor age and type (living, donation after circulatory death, donation after brain death), repeat transplantation, calendar year of transplantation, HLA mismatch, cold ischemia time, and transplant center.

Abbreviations: CMV, cytomegalovirus; D, donor; DSA, donor-specific antibody; HLA, human leukocyte antigen; R, recipient; Ref., reference.

## Table S9: Cox proportional hazards models for CMV serostatus and first antibody-mediated rejection (AMR)

| **Factors** | **Level** | **Events/ N analyzed** | **Events (group)/ N (group)** | **HR (95% CI)** | **P value** | **Events/ N analyzed** | **Events (group)/ N (group)** | **Adjusted HR (95% CI)** | **P value** |
| --- | --- | --- | --- | --- | --- | --- | --- | --- | --- |
|  |  | **UNIVARIABLE ANALYSIS** | | | | **MULTIVARIABLE ANALYSIS** | | | |
| Calendar year of transplantation (per year) | — | 229/3,709 | — | 0.97 (0.94–0.99) | 0.014 | 227/3,693 | — | 0.91 (0.88–0.95) | 7.13 × 10-6 |
| Centre | Basel | 229/3,709 | 26/460 | Ref. | Ref. | 227/3,693 | 26/460 | Ref. | Ref. |
|  | Leuven |  | 115/1,805 | 0.84 (0.55–1.29) | 0.42 |  | 115/1,804 | 0.55 (0.32–0.96) | 0.034 |
|  | Prague |  | 27/782 | 0.91 (0.53–1.57) | 0.74 |  | 27/782 | 1.05 (0.59–1.89) | 0.87 |
|  | Vienna |  | 61/662 | 1.77 (1.12–2.81) | 0.015 |  | 59/647 | 1.28 (0.77–2.11) | 0.34 |
| Cold ischemia time (per 5 hours) | — | 227/3,693 | — | 1.18 (1.06–1.31) | 0.0022 | 227/3,693 | — | 1.22 (1.05–1.40) | 0.0073 |
| Donor age (per 10 years) | — | 229/3,709 | — | 0.98 (0.90–1.07) | 0.65 | 227/3,693 | — | 1.01 (0.92–1.10) | 0.91 |
| Donor type | Living | 229/3,709 | 31/521 | Ref. | Ref. | 227/3,693 | 29/511 | Ref. | Ref. |
|  | DBD |  | 174/2,631 | 1.08 (0.73–1.58) | 0.71 |  | 174/2,626 | 0.65 (0.37–1.13) | 0.12 |
|  | DCD |  | 24/557 | 0.66 (0.39–1.13) | 0.13 |  | 24/556 | 0.55 (0.28–1.06) | 0.074 |
| Donor–recipient CMV serostatus | D−/R− | 229/3,709 | 33/742 | Ref. | Ref. | 227/3,693 | 33/739 | Ref. | Ref. |
|  | D+/R+ |  | 92/1,370 | 2.03 (1.36–3.03) | 4.96 × 10-4 |  | 91/1,363 | 1.77 (1.17–2.68) | 0.0067 |
|  | D+/R− |  | 40/724 | 1.44 (0.91–2.28) | 0.12 |  | 40/721 | 1.45 (0.91–2.30) | 0.12 |
|  | D−/R+ |  | 64/873 | 1.89 (1.24–2.88) | 0.003 |  | 63/870 | 1.66 (1.08–2.54) | 0.021 |
| HLA mismatch (per mismatch) | — | 229/3,709 | — | 1.13 (1.03–1.23) | 0.01 | 227/3,693 | — | 1.20 (1.09–1.33) | 3.50 × 10-4 |
| Recipient age (per 10 years) | — | 229/3,709 | — | 0.93 (0.85–1.03) | 0.15 | 227/3,693 | — | 0.95 (0.85–1.06) | 0.34 |
| Recipient sex | Male | 229/3,709 | 112/2,400 | Ref. | Ref. | 227/3,693 | 111/2,391 | Ref. | Ref. |
|  | Female |  | 117/1,309 | 1.88 (1.45–2.44) | 1.74 × 10-6 |  | 116/1,302 | 1.69 (1.30–2.20) | 8.92 × 10-5 |
| Repeat transplantation | No | 229/3,709 | 141/3,151 | Ref. | Ref. | 227/3,693 | 139/3,135 | Ref. | Ref. |
|  | Yes |  | 88/558 | 3.88 (2.97–5.06) | 2.19 × 10-23 |  | 88/558 | 3.61 (2.73–4.76) | 1.72 × 10-19 |

Values are hazard ratios (HRs) with 95% confidence intervals (CIs) from univariable and multivariable Cox proportional-hazards models. Total events and events per subgroup are presented as n/N, where n denotes the number of events and N the number of participants with non-missing data for the respective covariate. Multivariable models were adjusted for recipient age and sex, donor age and type (living, donation after circulatory death, donation after brain death), repeat transplantation, calendar year of transplantation, HLA mismatch, cold ischemia time, and transplant center.

Abbreviations: CMV, cytomegalovirus; D, donor; DSA, donor-specific antibody; HLA, human leukocyte antigen; R, recipient; Ref., reference.

## Table S10: Cox proportional hazards models for CMV serostatus graft failure

| **Factors** | **Level** | **Events/ N analyzed** | **Events (group)/ N (group)** | **HR (95% CI)** | **P value** | **Events/ N analyzed** | **Events (group)/ N (group)** | **Adjusted HR (95% CI)** | **P value** |
| --- | --- | --- | --- | --- | --- | --- | --- | --- | --- |
|  |  | **UNIVARIABLE ANALYSIS** | | | | **MULTIVARIABLE ANALYSIS** | | | |
| Calendar year of transplantation (per year) | — | 480/4,411 | — | 0.97 (0.95–0.99) | 0.0067 | 479/4,388 | — | 0.99 (0.96–1.02) | 0.38 |
| Centre | Basel | 480/4,411 | 29/506 | Ref. | Ref. | 479/4,388 | 29/506 | Ref. | Ref. |
|  | Leuven |  | 268/1,891 | 1.34 (0.91–1.99) | 0.14 |  | 268/1,890 | 1.31 (0.84–2.05) | 0.23 |
|  | Prague |  | 49/1,005 | 0.77 (0.49–1.22) | 0.27 |  | 49/1,001 | 0.69 (0.43–1.13) | 0.14 |
|  | Vienna |  | 134/1,009 | 1.79 (1.20–2.68) | 0.0046 |  | 133/991 | 1.40 (0.92–2.14) | 0.12 |
| Cold ischemia time (per 5 hours) | — | 479/4,392 | — | 1.21 (1.12–1.30) | 3.22 × 10-7 | 479/4,388 | — | 1.12 (1.02–1.24) | 0.015 |
| Donor age (per 10 years) | — | 480/4,411 | — | 1.21 (1.14–1.30) | 5.86 × 10-9 | 479/4,388 | — | 1.24 (1.16–1.33) | 2.52 × 10-9 |
| Donor type | Living | 480/4,411 | 37/632 | Ref. | Ref. | 479/4,388 | 37/619 | Ref. | Ref. |
|  | DBD |  | 385/3,161 | 1.96 (1.40–2.74) | 9.75 × 10-5 |  | 384/3,152 | 1.43 (0.94–2.17) | 0.098 |
|  | DCD |  | 58/618 | 1.50 (0.99–2.27) | 0.053 |  | 58/617 | 1.22 (0.76–1.98) | 0.41 |
| Donor–recipient CMV serostatus | D−/R− | 480/4,411 | 71/832 | Ref.. | Ref.. | 479/4,388 | 70/828 | Ref.. | Ref.. |
|  | D+/R+ |  | 179/1,673 | 1.60 (1.22–2.12) | 8.05 × 10-4 |  | 179/1,663 | 1.56 (1.17–2.07) | 0.0025 |
|  | D+/R− |  | 103/864 | 1.66 (1.23–2.25) | 9.77 × 10-4 |  | 103/859 | 1.62 (1.19–2.20) | 0.0021 |
|  | D−/R+ |  | 127/1,042 | 1.62 (1.21–2.17) | 0.0011 |  | 127/1,038 | 1.51 (1.12–2.02) | 0.0067 |
| HLA mismatch (per mismatch) | — | 480/4,411 | — | 1.07 (1.00–1.14) | 0.054 | 479/4,388 | — | 1.10 (1.02–1.18) | 0.0087 |
| HLA-DSA status | Negative | 480/4,407 | 377/3,945 | Ref. | Ref. | 479/4,388 | 376/3,927 | Ref. | Ref. |
|  | Positive |  | 103/462 | 2.59 (2.08–3.22) | 1.21 × 10-17 |  | 103/461 | 1.97 (1.53–2.54) | 1.21 × 10-7 |
| Recipient age (per 10 years) | — | 480/4,411 | — | 1.03 (0.96–1.10) | 0.39 | 479/4,388 | — | 0.93 (0.86–1.01) | 0.069 |
| Recipient sex | Male | 480/4,411 | 273/2,820 | Ref. | Ref. | 479/4,388 | 273/2,806 | Ref. | Ref. |
|  | Female |  | 207/1,591 | 1.32 (1.10–1.58) | 0.0024 |  | 206/1,582 | 1.19 (0.99–1.43) | 0.063 |
| Repeat transplantation | No | 480/4,411 | 365/3,754 | Ref. | Ref. | 479/4,388 | 364/3,731 | Ref. | Ref. |
|  | Yes |  | 115/657 | 1.88 (1.53–2.32) | 3.33 × 10-9 |  | 115/657 | 1.42 (1.12–1.81) | 0.0041 |

Values are hazard ratios (HRs) with 95% confidence intervals (CIs) from univariable and multivariable Cox proportional-hazards models. Total events and events per subgroup are presented as n/N, where n denotes the number of events and N the number of participants with non-missing data for the respective covariate. Multivariable models were adjusted for recipient age and sex, donor age and type (living, donation after circulatory death, donation after brain death), repeat transplantation, calendar year of transplantation, HLA mismatch, HLA-DSA status at transplantation, cold ischemia time, and transplant center.

Abbreviations: CMV, cytomegalovirus; D, donor; DSA, donor-specific antibody; HLA, human leukocyte antigen; R, recipient; Ref., reference.

## Table S11: Mediation analysis of the association between CMV serostatus, HLA–DSA status, HLA mismatch and graft failure

| **Factors** | **N** | **Events** | **Total effect HR (95% CI)** | **P value** | **Direct effect HR (95% CI)** | **P value** | **MVI (time-dependent) HR (95% CI)** | **P value** | **Attenuation % (boot 95% CI)** |
| --- | --- | --- | --- | --- | --- | --- | --- | --- | --- |
| D+/R− | 1467 | 149 | 1.77 (1.28-2.46) | 6.09 × 10-4 | 1,57 (1.13-2.18) | 0.0077 | 4.32 (3.02-6.17) | 9.92 × 10-16 | 21.7% (4.8-58.4) |
| D−/R+ | 1617 | 171 | 1.7 (1.24-2.33) | 8.80 × 10-4 | 1.39 (1.01-1.91) | 0.044 | 4.55 (3.27-6.33) | 2.06 × 10-19 | 38.4% (17.5-94.7) |
| D+/R+ | 2115 | 210 | 1.73 (1.28-2.34) | 3.70 × 10-4 | 1.52 (1.12-2.06) | 0.0068 | 3.44 (2.54-4.67) | 2.18 × 10-15 | 23.5% (10.1-54.5) |
| Any CMV+ | 3713 | 408 | 1.71 (1.3-2.25) | 1.10 × 10-4 | 1.49 (1.13-1.96) | 0.0044 | 3.66 (2.95-4.53) | 1.47 × 10-32 | 25.9% (13.3-50.5) |
| HLA-DSA status | 3709 | 408 | 2.44 (1.92-3.1) | 3.26 × 10-13 | 1.64 (1.27-2.12) | 1.26 × 10-4 | 3.36 (2.68-4.2) | 4.57 × 10-26 | 44.3% (30.2-66.2) |
| HLA Mismatch | 3713 | 408 | 1.1 (1.02-1.18) | 0.011 | 1.06 (0.99-1.14) | 0.092 | 3.75 (3.03-4.64) | 7.39 × 10-34 | 33.2% (11.5-132.2) |

Total effect HRs were derived from Cox proportional-hazards models including the risk factor of interest without adjustment for MVI. Direct effect HRs were derived from models additionally adjusting for MVI modelled as a time-dependent covariate. Mediation was quantified as the proportional attenuation of the risk factor coefficient on the log-hazard scale, calculated as (βbase − βadjusted) / βbase, where β denotes the Cox regression coefficient from models without and with time-dependent MVI, respectively. Confidence intervals were derived using nonparametric bootstrap resampling (1,000 iterations; seed = 123).

Abbreviations: CMV, cytomegalovirus; D, donor; DSA, donor-specific antibody; HLA, human leukocyte antigen; MVI, microvascular inflammation; R, recipient.

## Table S12: Cox proportional hazards models for post-transplant CMV replication

| **Factors** | **Level** | **Events/ N analyzed** | **Events (group)/ N (group)** | **HR (95% CI)** | **P value** | **Events/ N analyzed** | **Events (group)/ N (group)** | **Adjusted HR (95% CI)** | **P value** |
| --- | --- | --- | --- | --- | --- | --- | --- | --- | --- |
|  |  | **UNIVARIABLE ANALYSIS** | | | | **MULTIVARIABLE ANALYSIS** | | | |
| Calendar year of transplantation (per year) | — | 698/2,314 | — | 1.01 (1.00–1.03) | 0.13 | 697/2,313 | — | 1.00 (0.99–1.02) | 0.76 |
| Centre | Basel | 698/2,314 | 133/423 | Ref. | Ref. | 697/2,313 | 133/423 | Ref. | Ref. |
|  | Leuven | — | 565/1,891 | 0.86 (0.71–1.03) | 0.11 | — | 564/1,890 | 0.94 (0.74–1.19) | 0.58 |
| Cold ischemia time (per 5 hours) | — | 697/2,313 | — | 1.03 (0.97–1.09) | 0.32 | 697/2,313 | — | 0.93 (0.85–1.01) | 0.079 |
| Donor age (per 10 years) | — | 698/2,314 | — | 1.11 (1.06–1.17) | 4.77 × 10-5 | 697/2,313 | — | 1.04 (0.99–1.10) | 0.14 |
| Donor type | Living | 698/2,314 | 61/300 | Ref. | Ref. | 697/2,313 | 61/300 | Ref. | Ref. |
|  | DBD | — | 516/1,581 | 1.74 (1.33–2.26) | 4.64 × 10-5 | — | 515/1,580 | 2.10 (1.50–2.95) | 1.52 × 10-5 |
|  | DCD | — | 121/433 | 1.45 (1.06–1.97) | 0.019 | — | 121/433 | 2.04 (1.42–2.94) | 1.29 × 10-4 |
| Donor–recipient CMV serostatus | D−/R− | 698/2,314 | 19/612 | Ref. | Ref. | 697/2,313 | 19/612 | Ref. | Ref. |
|  | D+/R+ | — | 244/632 | 16.50 (10.34–26.32) | 5.86 × 10-32 | — | 244/632 | 16.27 (10.19–26.00) | 1.78 × 10-31 |
|  | D+/R− | — | 253/460 | 24.41 (15.30–38.93) | 4.97 × 10-41 | — | 252/459 | 23.71 (14.85–37.86) | 3.64 × 10-40 |
|  | D−/R+ | — | 182/610 | 11.69 (7.29–18.76) | 2.01 × 10-24 | — | 182/610 | 11.01 (6.85–17.68) | 3.46 × 10-23 |
| HLA mismatch (per mismatch) | — | 698/2,314 | — | 1.09 (1.04–1.15) | 7.69 × 10-4 | 697/2,313 | — | 1.07 (1.01–1.14) | 0.028 |
| HLA–DSA status | Negative | 698/2,314 | 649/2,108 | Ref. | Ref. | 697/2,313 | 648/2,107 | Ref. | Ref. |
|  | Positive | — | 49/206 | 0.72 (0.54–0.96) | 0.028 | — | 49/206 | 0.72 (0.53–0.98) | 0.037 |
| Recipient age (per 10 years) | — | 698/2,314 | — | 1.16 (1.10–1.24) | 9.64 × 10-7 | 697/2,313 | — | 1.07 (1.01–1.15) | 0.033 |
| Recipient sex | Male | 698/2,314 | 418/1,454 | Ref. | Ref. | 697/2,313 | 417/1,453 | Ref. | Ref. |
|  | Female | — | 280/860 | 1.14 (0.98–1.33) | 0.085 | — | 280/860 | 1.15 (0.99–1.34) | 0.072 |
| Repeat transplantation | No | 698/2,314 | 612/1,977 | Ref. | Ref. | 697/2,313 | 611/1,976 | Ref. | Ref. |
|  | Yes | — | 86/337 | 0.79 (0.63–0.99) | 0.043 | — | 86/337 | 0.80 (0.63–1.02) | 0.067 |

Values are hazard ratios (HRs) with 95% confidence intervals (CIs) from univariable and multivariable Cox proportional-hazards models. CMV replication was defined as detection of CMV DNA in any bodily fluid or tissue specimen. Total events and events per subgroup are presented as n/N, where n denotes the number of events and N the number of participants with non-missing data for the respective covariate. Multivariable models were adjusted for recipient age and sex, donor age and type (living, donation after circulatory death, donation after brain death), repeat transplantation, calendar year of transplantation, HLA mismatch, HLA-DSA status at transplantation, cold ischemia time, and transplant center.

Abbreviations: CMV, cytomegalovirus; D, donor; DSA, donor-specific antibody; HLA, human leukocyte antigen; R, recipient; Ref., reference.

## Table S13: Cox proportional hazards models for post-transplant CMV disease

| **Factors** | **Level** | **Events/ N analyzed** | **Events (group)/ N (group)** | **HR (95% CI)** | **P value** | **Events/ N analyzed** | **Events (group)/ N (group)** | **Adjusted HR (95% CI)** | **P value** |
| --- | --- | --- | --- | --- | --- | --- | --- | --- | --- |
|  |  | **UNIVARIABLE ANALYSIS** | | | | **MULTIVARIABLE ANALYSIS** | | | |
| Calendar year of transplantation (per year) | — | 249/2,314 | — | 0.98 (0.95–1.00) | 0.063 | 248/2,313 | — | 0.96 (0.93–0.99) | 0.0088 |
| Centre | Basel | 249/2,314 | 43/423 | Ref. | Ref. | 248/2,313 | 43/423 | Ref. | Ref. |
|  | Leuven |  | 206/1,891 | 1.02 (0.73–1.42) | 0.9 |  | 205/1,890 | 0.77 (0.51–1.17) | 0.23 |
| Cold ischemia time (per 5 hours) | — | 248/2,313 | — | 1.10 (0.99–1.21) | 0.077 | 248/2,313 | — | 0.91 (0.78–1.05) | 0.19 |
| Donor age (per 10 years) | — | 249/2,314 | — | 1.15 (1.05–1.25) | 0.0025 | 248/2,313 | — | 1.12 (1.02–1.23) | 0.018 |
| Donor type | Living | 249/2,314 | 16/300 | Ref. | Ref. | 248/2,313 | 16/300 | Ref. | Ref. |
|  | DBD |  | 192/1,581 | 2.37 (1.43–3.95) | 8.90 × 10-4 |  | 191/1,580 | 3.28 (1.75–6.12) | 2.00 × 10-4 |
|  | DCD |  | 41/433 | 1.82 (1.02–3.25) | 0.042 |  | 41/433 | 3.66 (1.87–7.14) | 1.48 × 10-4 |
| Donor–recipient CMV serostatus | D−/R− | 249/2,314 | 13/612 | Ref. | Ref. | 248/2,313 | 13/612 | Ref. | Ref. |
|  | D+/R+ |  | 50/632 | 3.96 (2.15–7.29) | 9.75 × 10-6 |  | 50/632 | 3.83 (2.07–7.08) | 1.86 × 10-5 |
|  | D+/R− |  | 164/460 | 20.86 (11.85–36.70) | 5.93 × 10-26 |  | 163/459 | 20.43 (11.58–36.06) | 2.23 × 10-25 |
|  | D−/R+ |  | 22/610 | 1.74 (0.87–3.44) | 0.12 |  | 22/610 | 1.54 (0.77–3.07) | 0.22 |
| HLA mismatch (per mismatch) | — | 249/2,314 | — | 1.03 (0.95–1.12) | 0.5 | 248/2,313 | — | 1.05 (0.95–1.16) | 0.36 |
| HLA–DSA status | Negative | 249/2,314 | 232/2,108 | Ref. | Ref. | 248/2,313 | 231/2,107 | Ref. | Ref. |
|  | Positive |  | 17/206 | 0.74 (0.45–1.21) | 0.23 |  | 17/206 | 0.92 (0.55–1.55) | 0.77 |
| Recipient age (per 10 years) | — | 249/2,314 | — | 1.04 (0.94–1.15) | 0.42 | 248/2,313 | — | 0.97 (0.87–1.08) | 0.58 |
| Recipient sex | Male | 249/2,314 | 143/1,454 | Ref. | Ref. | 248/2,313 | 142/1,453 | Ref. | Ref. |
|  | Female |  | 106/860 | 1.26 (0.98–1.62) | 0.072 |  | 106/860 | 1.48 (1.14–1.91) | 0.0028 |
| Repeat transplantation | No | 249/2,314 | 221/1,977 | Ref. | Ref. | 248/2,313 | 220/1,976 | Ref. | Ref. |
|  | Yes |  | 28/337 | 0.73 (0.49–1.08) | 0.12 |  | 28/337 | 0.81 (0.53–1.22) | 0.32 |

Values are hazard ratios (HRs) with 95% confidence intervals (CIs) from univariable and multivariable Cox proportional-hazards models. Post–transplant CMV disease was defined as either CMV syndrome or tissue-invasive CMV disease. Total events and events per subgroup are presented as n/N, where n denotes the number of events and N the number of participants with non-missing data for the respective covariate. Multivariable models were adjusted for recipient age and sex, donor age and type (living, donation after circulatory death, donation after brain death), repeat transplantation, calendar year of transplantation, HLA mismatch, HLA-DSA status at transplantation, cold ischemia time, and transplant center.

Abbreviations: CMV, cytomegalovirus; D, donor; DSA, donor-specific antibody; HLA, human leukocyte antigen; R, recipient; Ref., reference.

## Table S14: Time-dependent Cox proportional hazards models for post-transplant CMV replication and first MVI

| **Factors** | **Level** | **Events/ N analyzed** | **Events (group)/ N (group)** | **HR (95% CI)** | **P value** | **Events/ N analyzed** | **Events (group)/ N (group)** | **Adjusted HR (95% CI)** | **P value** |
| --- | --- | --- | --- | --- | --- | --- | --- | --- | --- |
|  |  | **UNIVARIABLE ANALYSIS** | | | | **MULTIVARIABLE ANALYSIS** | | | |
| Post-transplant CMV replication | No | 358/2,198 | 309/1,687 | Ref. | Ref. | 357/2,197 | 308/1,686 | Ref. | Ref. |
|  | Yes | — | 49/511 | 1.26 (0.91–1.74) | 0.17 | — | 49/511 | 1.20 (0.86–1.69) | 0.29 |
| Donor–recipient CMV serostatus | D−/R− | 358/2,198 | 57/588 | Ref. | Ref. | 357/2,197 | 57/588 | Ref. | Ref. |
|  | D+/R+ | — | 109/600 | 2.05 (1.49–2.83) | 1.09 × 10-5 | — | 109/600 | 1.78 (1.28–2.48) | 5.93 × 10-4 |
|  | D+/R− | — | 71/429 | 1.78 (1.26–2.53) | 0.0011 | — | 70/428 | 1.68 (1.17–2.41) | 0.0048 |
|  | D−/R+ | — | 121/581 | 2.30 (1.68–3.15) | 2.16 × 10-7 | — | 121/581 | 1.90 (1.38–2.62) | 9.65 × 10-5 |
| Cold ischemia time (per 5 hours) | — | 357/2,197 | — | 1.11 (1.02–1.21) | 0.014 | 357/2,197 | — | 1.13 (1.00–1.27) | 0.051 |
| Calendar year of transplantation (per year) | — | 358/2,198 | — | 0.96 (0.94–0.98) | 3.68 × 10-5 | 357/2,197 | — | 0.94 (0.91–0.96) | 2.36 × 10-6 |
| Center | Basel | 358/2,198 | 61/393 | Ref. | Ref. | 357/2,197 | 61/393 | Ref. | Ref. |
|  | Leuven | — | 297/1,805 | 0.87 (0.66–1.15) | 0.34 | — | 296/1,804 | 0.82 (0.57–1.18) | 0.28 |
| Donor age (per 10 years) | — | 358/2,198 | — | 1.14 (1.06–1.22) | 6.42 × 10-4 | 357/2,197 | — | 1.17 (1.08–1.26) | 1.36 × 10-4 |
| Donor type | Living | 358/2,198 | 40/287 | Ref. | Ref. | 357/2,197 | 40/287 | Ref. | Ref. |
|  | DBD | — | 260/1,498 | 1.19 (0.85–1.65) | 0.32 | — | 259/1,497 | 0.91 (0.57–1.44) | 0.68 |
|  | DCD | — | 58/413 | 0.96 (0.64–1.44) | 0.86 | — | 58/413 | 0.92 (0.55–1.54) | 0.75 |
| HLA mismatch (per mismatch) | — | 358/2,198 | — | 1.15 (1.07–1.23) | 1.68 × 10-4 | 357/2,197 | — | 1.16 (1.06–1.26) | 9.94 × 10-4 |
| HLA-DSA status | Negative | 358/2,198 | 263/2,002 | Ref. | Ref. | 357/2,197 | 262/2,001 | Ref. | Ref. |
|  | Positive | — | 95/196 | 5.07 (4.00–6.42) | 3.58 × 10-41 | — | 95/196 | 4.00 (3.06–5.22) | 2.92 × 10-24 |
| Recipient age (per 10 years) | — | 358/2,198 | — | 1.04 (0.96–1.13) | 0.34 | 357/2,197 | — | 0.96 (0.87–1.05) | 0.36 |
| Recipient sex | Male | 358/2,198 | 185/1,385 | Ref. | Ref. | 357/2,197 | 184/1,384 | Ref. | Ref. |
|  | Female | — | 173/813 | 1.62 (1.32–2.00) | 4.90 × 10-6 | — | 173/813 | 1.33 (1.07–1.65) | 0.0087 |
| Repeat transplantation | No | 358/2,198 | 277/1,879 | Ref. | Ref. | 357/2,197 | 276/1,878 | Ref. | Ref. |
|  | Yes | — | 81/319 | 1.93 (1.51–2.48) | 1.79 × 10-7 | — | 81/319 | 1.40 (1.06–1.85) | 0.019 |

Values are hazard ratios (HRs) with 95% confidence intervals (CIs) from univariable and multivariable time-dependent Cox proportional-hazards models. Total events and events per subgroup are presented as n/N, where n denotes the number of events and N the number of participants with non-missing data for the respective covariate. Multivariable models were adjusted for CMV serostatus, recipient age and sex, donor age and type (living, donation after circulatory death, donation after brain death), repeat transplantation, calendar year of transplantation, HLA mismatch, HLA-DSA status at transplantation, cold ischemia time, and transplant center.

Abbreviations: CMV, cytomegalovirus; D, donor; DSA, donor-specific antibody; HLA, human leukocyte antigen; R, recipient; Ref., reference.

## Table S15: Time-dependent Cox proportional hazards models for post-transplant CMV disease and first MVI

| **Factors** | **Level** | **Events/ N analyzed** | **Events (group)/ N (group)** | **HR (95% CI)** | **P value** | **Events/ N analyzed** | **Events (group)/ N (group)** | **Adjusted HR (95% CI)** | **P value** |
| --- | --- | --- | --- | --- | --- | --- | --- | --- | --- |
|  |  | **UNIVARIABLE ANALYSIS** | | | | **MULTIVARIABLE ANALYSIS** | | | |
| Post-transplant CMV disease | No | 358/2,198 | 332/2,011 | Ref. | Ref. | 357/2,197 | 331/2,010 | Ref. | Ref. |
|  | Yes |  | 26/187 | 2.12 (1.40–3.23) | 4.25 × 10-4 |  | 26/187 | 2.03 (1.30–3.18) | 0.0019 |
| Donor–recipient CMV serostatus | D−/R− | 358/2,198 | 57/588 | Ref. | Ref. | 357/2,197 | 57/588 | Ref. | Ref. |
|  | D+/R+ |  | 109/600 | 2.05 (1.49–2.83) | 1.09 × 10-5 |  | 109/600 | 1.77 (1.28–2.46) | 5.83 × 10-4 |
|  | D+/R− |  | 71/429 | 1.78 (1.26–2.53) | 0.0011 |  | 70/428 | 1.54 (1.07–2.23) | 0.02 |
|  | D−/R+ |  | 121/581 | 2.30 (1.68–3.15) | 2.16 × 10-7 |  | 121/581 | 1.94 (1.41–2.67) | 5.04 × 10-5 |
| Cold ischemia time (per 5 hours) | — | 357/2,197 | — | 1.11 (1.02–1.21) | 0.014 | 357/2,197 | — | 1.12 (1.00–1.26) | 0.059 |
| Calendar year of transplantation (per year) | — | 358/2,198 | — | 0.96 (0.94–0.98) | 3.68 × 10-5 | 357/2,197 | — | 0.94 (0.92–0.97) | 4.45 × 10-6 |
| Center | Basel | 358/2,198 | 61/393 | Ref. | Ref. | 357/2,197 | 61/393 | Ref. | Ref. |
|  | Leuven |  | 297/1,805 | 0.87 (0.66–1.15) | 0.34 |  | 296/1,804 | 0.85 (0.59–1.22) | 0.37 |
| Donor age (per 10 years) | — | 358/2,198 | — | 1.14 (1.06–1.22) | 6.42 × 10-4 | 357/2,197 | — | 1.16 (1.07–1.25) | 2.32 × 10-4 |
| Donor type | Living | 358/2,198 | 40/287 | Ref. | Ref. | 357/2,197 | 40/287 | Ref. | Ref. |
|  | DBD |  | 260/1,498 | 1.19 (0.85–1.65) | 0.32 |  | 259/1,497 | 0.90 (0.57–1.42) | 0.65 |
|  | DCD |  | 58/413 | 0.96 (0.64–1.44) | 0.86 |  | 58/413 | 0.90 (0.54–1.50) | 0.69 |
| HLA mismatch (per mismatch) | — | 358/2,198 | — | 1.15 (1.07–1.23) | 1.68 × 10-4 | 357/2,197 | — | 1.16 (1.06–1.27) | 7.60 × 10-4 |
| HLA-DSA status | Negative | 358/2,198 | 263/2,002 | Ref. | Ref. | 357/2,197 | 262/2,001 | Ref. | Ref. |
|  | Positive |  | 95/196 | 5.07 (4.00–6.42) | 3.58 × 10-41 |  | 95/196 | 3.98 (3.04–5.20) | 4.68 × 10-24 |
| Recipient age (per 10 years) | — | 358/2,198 | — | 1.04 (0.96–1.13) | 0.34 | 357/2,197 | — | 0.96 (0.88–1.05) | 0.37 |
| Recipient sex | Male | 358/2,198 | 185/1,385 | Ref. | Ref. | 357/2,197 | 184/1,384 | Ref. | Ref. |
|  | Female |  | 173/813 | 1.62 (1.32–2.00) | 4.90 × 10-6 |  | 173/813 | 1.32 (1.06–1.63) | 0.012 |
| Repeat transplantation | No | 358/2,198 | 277/1,879 | Ref. | Ref. | 357/2,197 | 276/1,878 | Ref. | Ref. |
|  | Yes |  | 81/319 | 1.93 (1.51–2.48) | 1.79 × 10-7 |  | 81/319 | 1.41 (1.07–1.87) | 0.016 |

Values are hazard ratios (HRs) with 95% confidence intervals (CIs) from univariable and multivariable time-dependent Cox proportional-hazards models. Total events and events per subgroup are presented as n/N, where n denotes the number of events and N the number of participants with non-missing data for the respective covariate. Multivariable models were adjusted for CMV serostatus, recipient age and sex, donor age and type (living, donation after circulatory death, donation after brain death), repeat transplantation, calendar year of transplantation, HLA mismatch, HLA-DSA status at transplantation, cold ischemia time, and transplant center.

Abbreviations: CMV, cytomegalovirus; D, donor; DSA, donor-specific antibody; HLA, human leukocyte antigen; R, recipient; Ref., reference.

## Table S16: Stratified time-dependent Cox proportional-hazards models of post-transplant CMV replication and first MVI, with interaction by recipient and donor serostatus

| **Stratum variable** | **Stratum level** | **Events/ N analyzed** | **Events (group)/ N (group)** | **HR (95% CI)** | **P value** | **Events/ N analyzed** | **Events (group)/ N (group)** | **HR (95% CI)** | **P value** |
| --- | --- | --- | --- | --- | --- | --- | --- | --- | --- |
|  |  | **UNIVARIABLE ANALYSIS** | | | | **MULTIVARIABLE ANALYSIS** | | | |
| Recipient CMV seropositivity | Recipient seronegative | 128/1017 | 27/202 | 3.12 (1.91–5.08) | 5.32 × 10-6 | 127/1016 | 27/202 | 2.31 (1.32–4.03) | 0.0034 |
|  | Recipient seropositive | 230/1181 | 22/309 | 0.63 (0.40–1.00) | 0.048 | 230/1181 | 22/309 | 0.74 (0.46–1.18) | 0.21 |
| Interaction (CMV replication × recipient serostatus) | | 358/2198 | — | 0.22 (0.12–0.41) | 1.78 × 10-6 | 357/2197 | — | 0.30 (0.16–0.56) | 1.48 × 10-4 |
| Donor CMV seropositivity | Donor seronegative | 178/1169 | 12/141 | 1.18 (0.65–2.16) | 0.58 | 178/1169 | 12/141 | 0.97 (0.52–1.82) | 0.93 |
|  | Donor seropositive | 180/1029 | 37/370 | 1.14 (0.75–1.72) | 0.53 | 179/1028 | 37/370 | 1.26 (0.82–1.92) | 0.29 |
| Interaction (CMV replication × donor serostatus) | | 358/2198 | — | 1.07 (0.54–2.13) | 0.85 | 357/2197 | — | 1.27 (0.63–2.56) | 0.5 |
| CMV serostatus | D−/R− | 57/588 | 3/13 | 8.52 (2.58–28.16) | 4.44 × 10-4 | 57/588 | 3/13 | 9.73 (2.84–33.33) | 2.92 × 10-4 |
|  | D−/R+ | 121/581 | 9/128 | 0.58 (0.29–1.18) | 0.13 | 121/581 | 9/128 | 0.61 (0.30–1.24) | 0.17 |
|  | D+/R− | 71/429 | 24/189 | 1.99 (1.05–3.77) | 0.034 | 70/428 | 24/189 | 1.76 (0.92–3.40) | 0.09 |
|  | D+/R+ | 109/600 | 13/181 | 0.67 (0.36–1.25) | 0.21 | 109/600 | 13/181 | 0.85 (0.45–1.60) | 0.61 |

Values are hazard ratios (HRs) with 95% confidence intervals (CIs) from univariable and multivariable time-dependent Cox proportional-hazards models assessing the association between post-transplant CMV replication and time to first MVI. CMV replication was modeled as a time-dependent covariate. Total events and events per subgroup are presented as n/N, where n denotes the number of events and N the number of participants with non-missing data for the respective stratum. Multivariable models were adjusted for recipient age and sex, donor age and type (living, donation after circulatory death, donation after brain death), repeat transplantation, calendar year of transplantation, HLA mismatch, HLA-DSA status at transplantation, cold ischemia time, and transplant center.

Interaction was evaluated by including a multiplicative interaction term between CMV replication and the respective serostatus variable in a joint Cox proportional-hazards model including both main effects and the interaction term. The reported interaction HR corresponds to the exponentiated coefficient of this interaction term. Interaction models evaluating recipient CMV serostatus were additionally adjusted for donor CMV serostatus, and vice versa.

Abbreviations: CMV, cytomegalovirus; D, donor; DSA, donor-specific antibody; HLA, human leukocyte antigen; MVI, microvascular inflammation; R, recipient.

## Table S17: Stratified time-dependent Cox proportional-hazards models of post-transplant CMV disease and first MVI, with interaction by recipient and donor serostatus

| **Stratum variable** | **Stratum level** | **Events/ N analyzed** | **Events (group)/ N (group)** | **HR (95% CI)** | **P value** | **Events/ N analyzed** | **Events (group)/ N (group)** | **HR (95% CI)** | **P value** |
| --- | --- | --- | --- | --- | --- | --- | --- | --- | --- |
|  |  | **UNIVARIABLE ANALYSIS** | | | | **MULTIVARIABLE ANALYSIS** | | | |
| Recipient CMV seropositivity | Recipient seronegative | 128/1,017 | 20/135 | 3.35 (1.96–5.72) | 9.93 × 10-6 | 127/1,016 | 20/135 | 2.32 (1.29–4.17) | 0.0048 |
|  | Recipient seropositive | 230/1,181 | 6/52 | 1.28 (0.56–2.92) | 0.55 | 230/1,181 | 6/52 | 1.48 (0.64–3.41) | 0.36 |
| Interaction (CMV replication × recipient serostatus) | | 358/2,198 | — | 0.38 (0.15–0.99) | 0.047 | 357/2,197 | — | 0.47 (0.18–1.21) | 0.12 |
| Donor CMV seropositivity | Donor seronegative | 178/1169 | 4/21 | 4.07 (1.49–11.08) | 0.006 | 178/1169 | 4/21 | 4.74 (1.71–13.11) | 0.0027 |
|  | Donor seropositive | 180/1029 | 22/166 | 1.72 (1.06–2.81) | 0.029 | 179/1028 | 22/166 | 1.68 (1.01–2.78) | 0.046 |
| Interaction (CMV replication × donor serostatus) | | 358/2,198 | — | 0.45 (0.15–1.33) | 0.15 | 357/2,197 | — | 0.41 (0.14–1.22) | 0.11 |
| CMV serostatus | D−/R− | 57/588 | 2/10 | 6.75 (1.60–28.50) | 0.0094 | 57/588 | 2/10 | 7.71 (1.76–33.71) | 0.0067 |
|  | D−/R+ | 121/581 | 2/11 | 2.49 (0.61–10.17) | 0.21 | 121/581 | 2/11 | 3.03 (0.72–12.68) | 0.13 |
|  | D+/R− | 71/429 | 18/125 | 2.22 (1.16–4.26) | 0.017 | 70/428 | 18/125 | 1.90 (0.98–3.71) | 0.059 |
|  | D+/R+ | 109/600 | 4/41 | 1.07 (0.39–2.97) | 0.89 | 109/600 | 4/41 | 1.09 (0.39–3.07) | 0.87 |

Values are hazard ratios (HRs) with 95% confidence intervals (CIs) from univariable and multivariable time-dependent Cox proportional-hazards models assessing the association between post-transplant CMV disease and time to first MVI. CMV disease was modeled as a time-dependent covariate. Total events and events per subgroup are presented as n/N, where n denotes the number of events and N the number of participants with non-missing data for the respective stratum. Multivariable models were adjusted for recipient age and sex, donor age and type (living, donation after circulatory death, donation after brain death), repeat transplantation, calendar year of transplantation, HLA mismatch, HLA-DSA status at transplantation, cold ischemia time, and transplant center.

Interaction was evaluated by including a multiplicative interaction term between CMV disease and the respective serostatus variable in a joint Cox proportional-hazards model including both main effects and the interaction term. The reported interaction HR corresponds to the exponentiated coefficient of this interaction term. Interaction models evaluating recipient CMV serostatus were additionally adjusted for donor CMV serostatus, and vice versa.

Abbreviations: CMV, cytomegalovirus; D, donor; DSA, donor-specific antibody; HLA, human leukocyte antigen; MVI, microvascular inflammation; R, recipient.

## Table S18: Time-dependent Cox proportional hazards models for post-transplant CMV replication and graft failure

| **Factors** | **Level** | **Events/ N analyzed** | **Events (group)/ N (group)** | **HR (95% CI)** | **P value** | **Events/N analyzed** | **Events (group)/ N (group)** | **Adjusted HR (95% CI)** | **P value** |
| --- | --- | --- | --- | --- | --- | --- | --- | --- | --- |
|  |  | **UNIVARIABLE ANALYSIS** | | | | **MULTIVARIABLE ANALYSIS** | | | |
| Post-transplant CMV replication | No | 293/2,314 | 198/1,605 | Ref. | Ref. | 293/2,313 | 198/1,605 | Ref. | Ref. |
|  | Yes |  | 95/709 | 1.65 (1.27–2.13) | 1.42 × 10-4 |  | 95/708 | 1.46 (1.11–1.94) | 0.0077 |
| Donor–recipient CMV serostatus | D−/R− | 293/2,314 | 55/612 | Ref. | Ref. | 293/2,313 | 55/612 | Ref. | Ref. |
|  | D+/R+ |  | 85/632 | 1.70 (1.21–2.39) | 0.0022 |  | 85/632 | 1.35 (0.94–1.93) | 0.1 |
|  | D+/R− |  | 66/460 | 1.74 (1.22–2.49) | 0.0024 |  | 66/459 | 1.35 (0.92–1.98) | 0.13 |
|  | D−/R+ |  | 87/610 | 1.71 (1.22–2.40) | 0.0018 |  | 87/610 | 1.37 (0.97–1.95) | 0.075 |
| Cold ischemia time (per 5 hours) | — | 293/2,313 | — | 1.15 (1.05–1.27) | 0.0035 | 293/2,313 | — | 1.10 (0.97–1.25) | 0.14 |
| Calendar year of transplantation (per year) | — | 293/2,314 | — | 0.98 (0.96–1.01) | 0.2 | 293/2,313 | — | 0.99 (0.96–1.02) | 0.42 |
| Center | Basel | 293/2,314 | 25/423 | Ref. | Ref. | 293/2,313 | 25/423 | Ref. | Ref. |
|  | Leuven |  | 268/1,891 | 1.29 (0.85–1.96) | 0.24 |  | 268/1,890 | 1.45 (0.90–2.36) | 0.13 |
| Donor age (per 10 years) | — | 293/2,314 | — | 1.21 (1.11–1.31) | 1.74 × 10-5 | 293/2,313 | — | 1.23 (1.12–1.35) | 1.23 × 10-5 |
| Donor type | Living | 293/2,314 | 18/300 | Ref. | Ref. | 293/2,313 | 18/300 | Ref. | Ref. |
|  | DBD |  | 232/1,581 | 1.97 (1.22–3.19) | 0.0055 |  | 232/1,580 | 1.67 (0.92–3.05) | 0.092 |
|  | DCD |  | 43/433 | 1.45 (0.84–2.52) | 0.19 |  | 43/433 | 1.38 (0.72–2.65) | 0.34 |
| HLA mismatch (per mismatch) | — | 293/2,314 | — | 1.12 (1.03–1.21) | 0.011 | 293/2,313 | — | 1.17 (1.06–1.29) | 0.0018 |
| HLA–DSA status | Negative | 293/2,314 | 239/2,108 | Ref. | Ref. | 293/2,313 | 239/2,107 | Ref. | Ref. |
|  | Positive |  | 54/206 | 2.58 (1.92–3.46) | 3.51 × 10-10 |  | 54/206 | 2.08 (1.49–2.90) | 1.58 × 10-5 |
| Recipient age (per 10 years) | — | 293/2,314 | — | 1.03 (0.94–1.13) | 0.53 | 293/2,313 | — | 0.91 (0.82–1.00) | 0.059 |
| Recipient sex | Male | 293/2,314 | 166/1,454 | Ref. | Ref. | 293/2,313 | 166/1,453 | Ref. | Ref. |
|  | Female |  | 127/860 | 1.26 (1.00–1.59) | 0.046 |  | 127/860 | 1.18 (0.93–1.49) | 0.18 |
| Repeat transplantation | No | 293/2,314 | 227/1,977 | Ref. | Ref. | 293/2,313 | 227/1,976 | Ref. | Ref. |
|  | Yes |  | 66/337 | 1.83 (1.39–2.41) | 1.44 × 10-5 |  | 66/337 | 1.55 (1.13–2.12) | 0.0059 |

Values are hazard ratios (HRs) with 95% confidence intervals (CIs) from univariable and multivariable time-dependent Cox proportional-hazards models. Total events and events per subgroup are presented as n/N, where n denotes the number of events and N the number of participants with non-missing data for the respective covariate. Multivariable models were adjusted for CMV serostatus, recipient age and sex, donor age and type (living, donation after circulatory death, donation after brain death), repeat transplantation, calendar year of transplantation, HLA mismatch, HLA-DSA status at transplantation, cold ischemia time, and transplant center.

Abbreviations: CMV, cytomegalovirus; D, donor; DSA, donor-specific antibody; HLA, human leukocyte antigen; R, recipient; Ref., reference.

## Table S19: Time-dependent Cox proportional hazards models for post-transplant CMV disease and graft failure

| **Factors** | **Level** | **Events/ N analyzed** | **Events (group)/ N (group)** | **HR (95% CI)** | **P value** | **Events/N analyzed** | **Events (group)/ N (group)** | **Adjusted HR (95% CI)** | **P value** |
| --- | --- | --- | --- | --- | --- | --- | --- | --- | --- |
|  |  | **UNIVARIABLE ANALYSIS** | | | | **MULTIVARIABLE ANALYSIS** | | | |
| Post-transplant CMV disease | No | 293/2,314 | 255/2,064 | Ref. | Ref. | 293/2,313 | 255/2,064 | Ref. | Ref. |
|  | Yes |  | 38/250 | 1.71 (1.21–2.42) | 0.0026 |  | 38/249 | 1.55 (1.04–2.29) | 0.03 |
| Donor–recipient CMV serostatus | D−/R− | 293/2,314 | 55/612 | Ref. | Ref. | 293/2,313 | 55/612 | Ref. | Ref. |
|  | D+/R+ |  | 85/632 | 1.70 (1.21–2.39) | 0.0022 |  | 85/632 | 1.49 (1.05–2.11) | 0.024 |
|  | D+/R− |  | 66/460 | 1.74 (1.22–2.49) | 0.0024 |  | 66/459 | 1.39 (0.94–2.05) | 0.1 |
|  | D−/R+ |  | 87/610 | 1.71 (1.22–2.40) | 0.0018 |  | 87/610 | 1.50 (1.06–2.11) | 0.021 |
| Cold ischemia time (per 5 hours) | — | 293/2,313 | — | 1.15 (1.05–1.27) | 0.0035 | 293/2,313 | — | 1.09 (0.96–1.24) | 0.17 |
| Calendar year of transplantation (per year) | — | 293/2,314 | — | 0.98 (0.96–1.01) | 0.2 | 293/2,313 | — | 0.99 (0.96–1.02) | 0.53 |
| Centre | Basel | 293/2,314 | 25/423 | Ref. | Ref. | 293/2,313 | 25/423 | Ref. | Ref. |
|  | Leuven |  | 268/1,891 | 1.29 (0.85–1.96) | 0.24 |  | 268/1,890 | 1.51 (0.93–2.45) | 0.096 |
| Donor age (per 10 years) | — | 293/2,314 | — | 1.21 (1.11–1.31) | 1.74 × 10-5 | 293/2,313 | — | 1.23 (1.12–1.35) | 1.20 × 10-5 |
| Donor type | Living | 293/2,314 | 18/300 | Ref. | Ref. | 293/2,313 | 18/300 | Ref. | Ref. |
|  | DBD |  | 232/1,581 | 1.97 (1.22–3.19) | 0.0055 |  | 232/1,580 | 1.70 (0.94–3.09) | 0.081 |
|  | DCD |  | 43/433 | 1.45 (0.84–2.52) | 0.19 |  | 43/433 | 1.38 (0.72–2.66) | 0.33 |
| HLA mismatch (per mismatch) | — | 293/2,314 | — | 1.12 (1.03–1.21) | 0.011 | 293/2,313 | — | 1.17 (1.06–1.30) | 0.0015 |
| HLA–DSA status | Negative | 293/2,314 | 239/2,108 | Ref. | Ref. | 293/2,313 | 239/2,107 | Ref. | Ref. |
|  | Positive |  | 54/206 | 2.58 (1.92–3.46) | 3.51 × 10-10 |  | 54/206 | 2.05 (1.47–2.86) | 2.22 × 10-5 |
| Recipient age (per 10 years) | — | 293/2,314 | — | 1.03 (0.94–1.13) | 0.53 | 293/2,313 | — | 0.91 (0.82–1.00) | 0.057 |
| Recipient sex | Male | 293/2,314 | 166/1,454 | Ref. | Ref. | 293/2,313 | 166/1,453 | Ref. | Ref. |
|  | Female |  | 127/860 | 1.26 (1.00–1.59) | 0.046 |  | 127/860 | 1.17 (0.92–1.48) | 0.2 |
| Repeat transplantation | No | 293/2,314 | 227/1,977 | Ref. | Ref. | 293/2,313 | 227/1,976 | Ref. | Ref. |
|  | Yes |  | 66/337 | 1.83 (1.39–2.41) | 1.44 × 10-5 |  | 66/337 | 1.54 (1.13–2.10) | 0.0068 |

Values are hazard ratios (HRs) with 95% confidence intervals (CIs) from univariable and multivariable time-dependent Cox proportional-hazards models. Total events and events per subgroup are presented as n/N, where n denotes the number of events and N the number of participants with non-missing data for the respective covariate. Multivariable models were adjusted for CMV serostatus, recipient age and sex, donor age and type (living, donation after circulatory death, donation after brain death), repeat transplantation, calendar year of transplantation, HLA mismatch, HLA-DSA status at transplantation, cold ischemia time, and transplant center.

Abbreviations: CMV, cytomegalovirus; D, donor; DSA, donor-specific antibody; HLA, human leukocyte antigen; R, recipient; Ref., reference.
